# Supplementary material for: Acute NO2 Stress Shortens the Median Survival Period of Bougainvillea glabra ‘Elizabeth Angus’ by Disrupting Tissue Structure and Photosynthetic Response Centers
Source: MDPI journal article supplement (doi:10.3390/plants12234028), 2023-11-30
Supplement: s1 [file s1]

# Acute NO<sub>2</sub> Stress Shortens the Median Survival Period of *Bougainvillea glabra* 'Elizabeth Angus' by Disrupting Tissue Structure and Photosynthetic Response Centers

## Supplementary materials

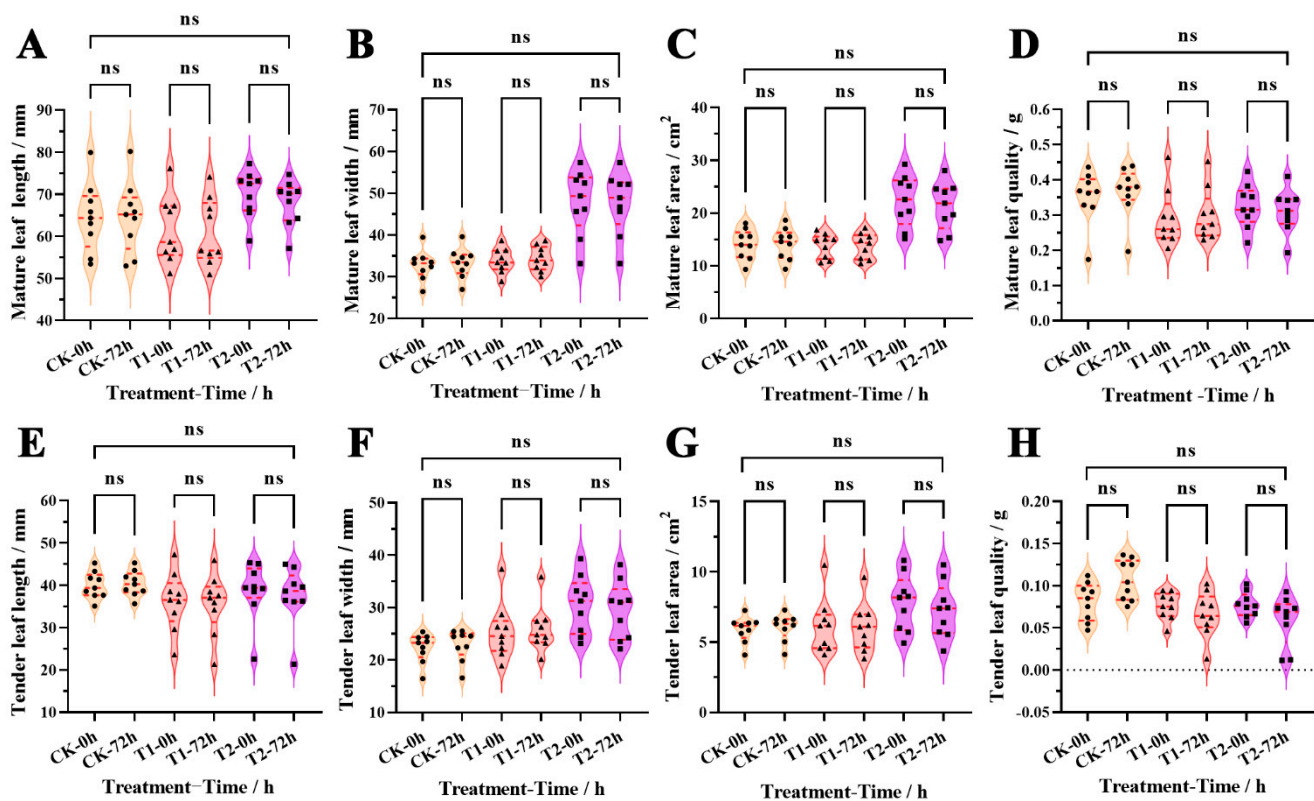

**Figure S1.** Changes in leaf morphology indicators of *B. glabra* 'Elizabeth Angus' under different fumigation times of treatments. (A) Mature leaf length. (B) Mature leaf width. (C) Mature leaf area. (D) Mature leaf quality. (E) Tender leaf length. (F) Tender leaf width. (G) Tender leaf area. (H) Tender leaf quality.

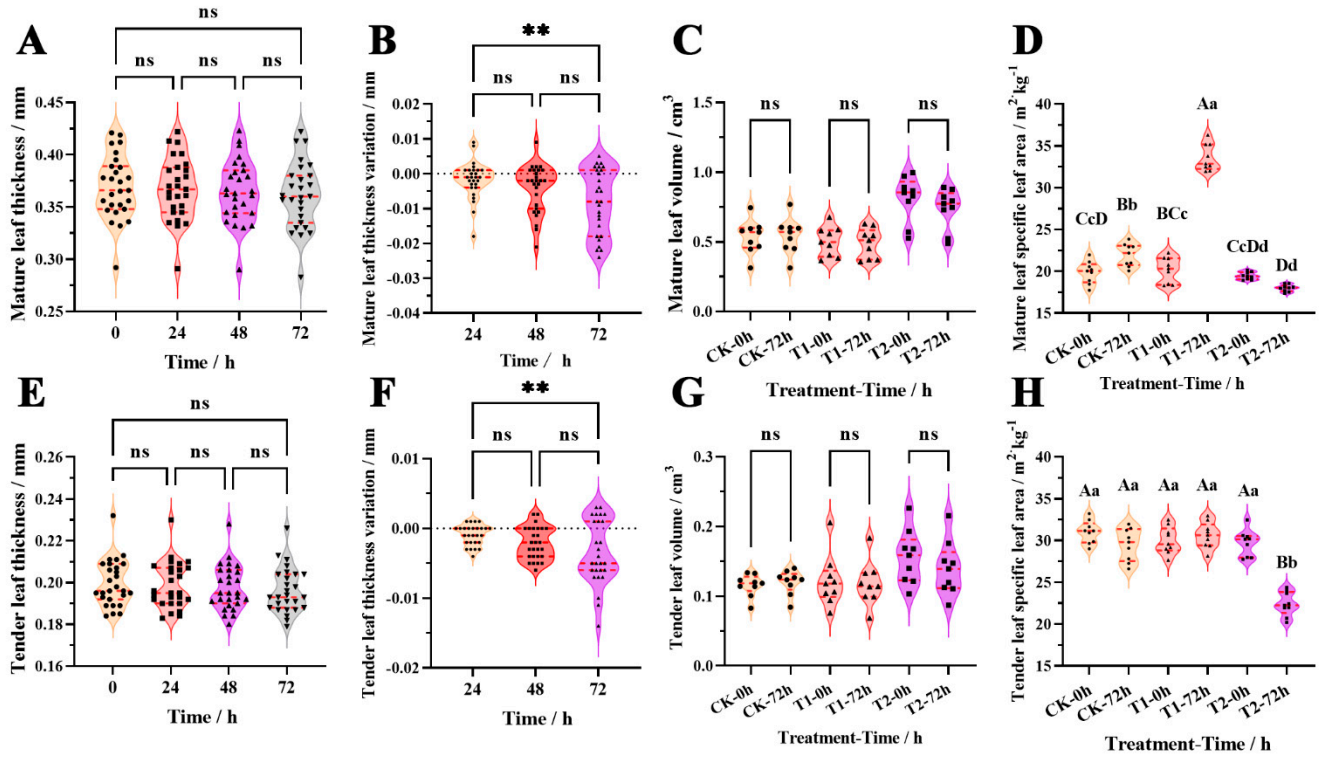

**Figure S2.** Changes in leaf functional trait indicators of *B. glabra* 'Elizabeth Angus' under different fumigation times of treatments. (A) Mature leaf thickness. (B) Mature leaf thickness variation. (C) Mature leaf volume (D) Mature leaf Specific leaf area. (E) Tender leaf thickness. (F) Tender leaf thickness variation. (G) Tender leaf volume (H) Tender leaf specific leaf area.

**Table S1.** Mantel test significance *p*-value and correlation *R*-value between treatments group and index.

| Factor                           | <i>p</i> -value between treatments |       |       | Correlation <i>R</i> -value between treatments |        |        |
|----------------------------------|------------------------------------|-------|-------|------------------------------------------------|--------|--------|
|                                  | CK                                 | T1    | T2    | CK                                             | T1     | T2     |
| Total root length                | 0.405                              | 0     | 0     | -0.318                                         | 0.949  | 0.949  |
| Root surface area                | 0.197                              | 0     | 0.001 | -0.474                                         | 0.949  | 0.896  |
| Root volume                      | 0.197                              | 1     | 1     | 0.474                                          | 0      | 0      |
| Average root                     | 0.145                              | 0.329 | 0.447 | -0.527                                         | -0.369 | -0.291 |
| Main root length                 | 0.258                              | 0.893 | 0.685 | 0.422                                          | -0.053 | 0.158  |
| Laternal root length             | 0.329                              | 0.685 | 0.329 | -0.369                                         | -0.158 | -0.369 |
| Main root width                  | 0.787                              | 0.011 | 0.042 | 0.105                                          | -0.791 | -0.685 |
| Laternal root width              | 0.145                              | 0.011 | 0.329 | 0.527                                          | 0.794  | -0.369 |
| Mature leaf L chromatism         | 0.893                              | 0.258 | 0.197 | -0.053                                         | -0.422 | -0.474 |
| Mature leaf a chromatism         | 0.407                              | 0.787 | 0.946 | 0.316                                          | -0.105 | -0.026 |
| Mature leaf b chromatism         | 1                                  | 0.893 | 0.787 | 0                                              | 0.053  | -0.105 |
| Tender leaf L Chromatism         | 0.493                              | 0.787 | 0.143 | 0.264                                          | 0.105  | 0.529  |
| Tender leaf a Chromatism         | 0.586                              | 0.168 | 0.787 | 0.211                                          | -0.503 | -0.105 |
| Tender leaf b Chromatism         | 0.102                              | 0.786 | 0.329 | 0.58                                           | -0.106 | 0.369  |
| Matuure leaf thickness variation | 0.354                              | 0.892 | 0.405 | -0.351                                         | -0.053 | -0.318 |
| Mature leaf specific area        | 0.102                              | 0.068 | 0.042 | 0.58                                           | 0.632  | -0.685 |
| Tender leaf thickness variation  | 0.374                              | 0.08  | 0.484 | -0.338                                         | -0.611 | 0.269  |
| Bract L chromatism               | 0.258                              | 0.258 | 0.004 | 0.422                                          | -0.422 | 0.843  |
| Bract a chromatism               | 0.493                              | 0.197 | 0.102 | 0.264                                          | -0.474 | -0.58  |
| Bract b chromatism               | 0.493                              | 0.493 | 0.168 | 0.264                                          | -0.264 | 0.503  |
| Root water content               | 0.281                              | 0.29  | 0.491 | -0.404                                         | -0.397 | -0.265 |

|                        |       |       |       |        |        |        |
|------------------------|-------|-------|-------|--------|--------|--------|
| Whole plant water      | 0.893 | 1     | 0.786 | 0.053  | 0      | -0.106 |
| Stem chlorophyll a     | 0.683 | .     | 0.17  | 0.159  | 1      | 0.5    |
| Leaf chlorophyll a     | 0.407 | 0.683 | 0.254 | 0.316  | 0.159  | -0.425 |
| Leaf chlorophyll b     | 0.685 | 0.893 | 0.493 | -0.158 | -0.053 | 0.264  |
| Bract chlorophyll b    | 0.283 | 0.489 | 0.633 | -0.402 | -0.266 | -0.185 |
| Stem total chlorophyll | 0.195 | .     | .     | 0.476  | 1      | 1      |
| Leaf total chlorophyll | 0.407 | 0.586 | 0.258 | 0.316  | 0.211  | -0.422 |
| Leaf carotenoids       | 0.17  | 1     | 0.586 | 0.5    | 0      | 0.211  |
| Fo                     | 0.491 | 0.787 | 0.787 | -0.265 | -0.105 | 0.105  |
| Fm                     | 0.197 | 0.893 | 0.893 | -0.474 | 0.053  | 0.053  |
| Fv                     | 0.197 | 0.893 | 1     | -0.474 | 0.053  | 0      |
| Vi                     | 0.329 | 0.023 | 0.329 | 0.369  | -0.738 | 0.369  |
| Vj                     | 0.893 | 0.407 | 0.329 | 0.053  | -0.316 | 0.369  |
| Fv/Fo                  | 0.329 | 0.586 | 0.586 | -0.369 | 0.211  | -0.211 |
| $\Phi(Po)=Fv/Fm$       | 0.329 | 0.586 | 0.786 | -0.369 | 0.211  | -0.106 |
| $\Phi(Eo)$             | 0.893 | 0.329 | 0.329 | -0.053 | 0.369  | -0.369 |
| $\psi(Eo)$             | 0.893 | 0.023 | 0.145 | -0.053 | 0.738  | -0.527 |
| $\Phi(Ro)$             | 0.685 | 0.407 | 0.145 | -0.158 | 0.316  | -0.527 |
| $\Phi(Do)=Fo/Fm$       | 0.329 | 0.586 | 0.586 | 0.369  | -0.211 | 0.211  |
| ABS/RC                 | 0.685 | 0.734 | 0.329 | 0.158  | 0.132  | 0.369  |
| ETo/RC                 | 0.023 | 0.685 | 0.493 | -0.738 | -0.158 | -0.264 |
| REo/RC                 | 0.288 | 0.893 | 0.493 | -0.399 | 0.053  | -0.264 |
| PI (ABS)               | 0.493 | 0.685 | 0.258 | -0.264 | 0.158  | -0.422 |
| Pn                     | 0.491 | 0.581 | 0.038 | 0.265  | -0.214 | -0.694 |
| Ci                     | 1     | 0.535 | 0.682 | 0      | 0.239  | 0.159  |
| Gs                     | 0.683 | 0.681 | 0.633 | -0.159 | 0.16   | -0.185 |
| Tr                     | 0.839 | 0.583 | 1     | -0.079 | 0.213  | 0      |
| VPD                    | 0.258 | 0.102 | 0.946 | -0.422 | -0.58  | 0.026  |
| WUE                    | 0.893 | 0.1   | 0.633 | 0.053  | -0.582 | -0.185 |
